# Supplementary material for: Volume viscosity and ultrasonic relaxation of ethanol–water mixtures studied by molecular dynamics simulations
Source: Royal Society of Chemistry journal article supplement (doi:10.1039/d2cp00856d), 2022-01-01
Supplement: d2cp00856d1.pdf [file d2cp00856d1.pdf]

# **Supporting Information for “Volume viscosity and ultrasonic relaxation of ethanol-water mixtures studied by molecular dynamics simulation”**

Tsuyoshi Yamaguchi

Graduate School of Engineering, Nagoya University, Chikusa, Nagoya, 464–8603, Japan

Corresponding Author:

Tsuyoshi Yamaguchi: [yamaguchi.tsuyoshi@material.nagoya-u.ac.jp](mailto:yamaguchi.tsuyoshi@material.nagoya-u.ac.jp)

### S1. COEFFICIENT OF $\delta E$ IN EQ. (5)

We defined the adiabatic fluctuation of isotropic pressure,  $\delta P'$ , in eq. (5) of the main text as

$$\delta P'(t) = \delta P(t) - \frac{\langle \delta P \delta E \rangle}{\langle |\delta E|^2 \rangle} \delta E(t). \quad (\text{S1})$$

On the other hand, it is defined in other literatures as<sup>1-3</sup>

$$\delta P'(t) = \delta P(t) - \frac{1}{V} \left( \frac{\partial P}{\partial \epsilon} \right)_{N,V} \delta E(t), \quad (\text{S2})$$

where  $\epsilon \equiv E/V$  denotes the energy per unit volume. Hereafter we show the equivalence of these two expressions.

The correlation of fluctuation of a physical quantity with  $\delta E$  can be converted into the derivative of its average value with respect to temperature as

$$\langle \delta P \delta E \rangle = k_B T^2 \left( \frac{\partial \langle P \rangle}{\partial T} \right)_{N,V}, \quad (\text{S3})$$

$$\langle |\delta E|^2 \rangle = k_B T^2 \left( \frac{\partial \langle E \rangle}{\partial T} \right)_{N,V}. \quad (\text{S4})$$

The combination of these two equations gives

$$\frac{\langle \delta P \delta E \rangle}{\langle |\delta E|^2 \rangle} = \left( \frac{\partial \langle P \rangle}{\partial \langle E \rangle} \right)_{N,V} = \frac{1}{V} \left( \frac{\partial P}{\partial \epsilon} \right)_{N,V}, \quad (\text{S5})$$

which equates Eqs. (S1) and (S2).

We described  $\delta P'$  in the form of eq. (5) of the main text for two reasons. The first one is that it clearly indicates that the contribution of  $\delta E$  is projected out. The second one is computational. In the numerical calculation of  $K(t)$ , three time correlation functions,  $\langle \delta P(0) \delta P(t) \rangle$ ,  $\langle \delta P(0) \delta E(t) \rangle$  and  $\langle \delta E(0) \delta E(t) \rangle$ , are evaluated simultaneously. The coefficient of  $\delta E$  in eq. (5) is easily evaluated as the combination of their initial values, and  $K(t)$  is then calculated as the linear combination of these three correlation functions.

## S2. CONCENTRATION DEPENDENCE OF PRESSURE IN OUR NVT-ENSEMBLE SIMULATION

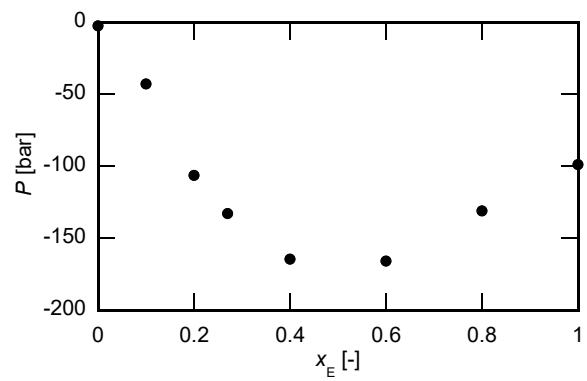

**FIGURE S1.** The mean pressure of our NVT-constant runs as the function of the mole fraction of ethanol,  $x_E$ .

### S3. CONCENTRATION FLUCTUATION MODE

In the analysis of small angle X-ray or neutron scattering of binary liquid mixture, the low- $q$  limiting value of the scattering function is often divided into the contributions of the fluctuation of the total number of molecules,  $N$ , and that of the concentration,  $c$ .<sup>4, 5</sup> Denoting the indexes of the binary components as ‘E’ and ‘W’, these two quantities are related to the numbers of the component molecules as

$$N \equiv N_E + N_W, \quad (\text{S6})$$

$$c \equiv \frac{N_W}{N_E + N_W}. \quad (\text{S7})$$

The fluctuation of the former is related to the isobaric compressibility, whereas that of the latter is to the osmotic compressibility.

The linear fluctuation of eq. (S7) gives

$$\delta c = \frac{1}{N} [x_E \delta N_W - (1 - x_E) \delta N_E] = \frac{V}{N} [x_E \delta \rho_W - (1 - x_E) \delta \rho_E]. \quad (\text{S8})$$

The inner part of the square bracket of the right-hand side is equal to  $\tilde{\rho}_c(\mathbf{q} = \mathbf{0})$  defined by eq. (14) of the main text. Therefore, our analysis based on  $\tilde{\rho}_c(\mathbf{q})$  is essentially equivalent to the experimental analysis based on the concentration fluctuation.

## References

1. J. A. McLennan, *Prog. Theor. Phys.*, 1963, **30**, 408-409.
2. R. Zwanzig, *Annu. Rev. Phys. Chem.*, 1965, **16**, 67-102.
3. P. L. Palla, C. Pierleoni and G. Ciccotti, *Phys. Rev. E*, 2008, **78**, 021204.
4. K. Nishikawa and T. Iijima, *J. Phys. Chem.*, 2002, **97**, 10824-10828.
5. K. Nishikawa, *Bull. Chem. Soc. Jpn.*, 2021, **94**, 2170-2186.
